1       **A high-throughput method for unbiased quantitation and categorisation of**  
2                                               **nuclear morphology**

3  
4 Benjamin Matthew Skinner<sup>1</sup>

5 Claudia Cattoni Rathje<sup>2</sup>

6 Joanne Bacon<sup>1</sup>

7 Emma Elizabeth Philippa Johnson<sup>1</sup>

8 Erica Lee Larson<sup>3,4</sup>

9 Emily Emiko Konishi Kopania<sup>4</sup>

10 Jeffrey Martin Good<sup>4</sup>

11 Gullalail Yousafzai<sup>2</sup>

12 Nabeel Ahmed Affara<sup>1</sup>

13 Peter James Ivor Ellis<sup>2,5</sup>

14

15 <sup>1</sup> Department of Pathology, University of Cambridge, Cambridge, CB2 1QP, UK

16 <sup>2</sup> School of Biosciences, University of Kent, Canterbury, CT2 7NJ, UK

17 <sup>3</sup> Department of Biological Sciences, University of Denver, Denver, CO, USA

18 <sup>4</sup> Division of Biological Sciences, University of Montana, MT, USA

19 <sup>5</sup> Corresponding author

20

21 Running title: Nuclear morphology analysis in mouse sperm

22

23 Keywords: spermatogenesis, morphometrics, fertility, image analysis, F1 cross

24

## 1 **Abstract**

2

3 The physical arrangement of chromatin in the nucleus is cell type and species specific. This  
4 is particularly evident in sperm, in which most of the cytoplasm has been lost; the shape of  
5 the nucleus reflects the shape of the cell. Mice have distinctive falciform ('hook shaped')  
6 sperm heads and nuclei. Quantification of the differences in shape variation between mouse  
7 species and lines often relies on manual measurement and classification that leads to  
8 subjective results, making comparisons within and between samples difficult.

9

10 We have developed an analysis program for assessing the morphology of asymmetric  
11 nuclei, and characterised the sperm of mice from a range of inbred, outbred and wild-derived  
12 mouse lines. We find that laboratory lines have elevated sperm shape variability both within  
13 and between samples in comparison to wild-derived inbred lines, and that sperm shape in  
14 the F1 offspring of CBA and C57Bl6J lines is subtly affected by the direction of the cross.

15

16 Hierarchical clustering can distinguish distinct sperm shapes with greater efficiency and  
17 reproducibility than even experienced manual assessors. We quantified the range of  
18 morphological defects in the inbred BALB/c line, demonstrating we can identify different  
19 morphological subgroups. This approach has applications for studies of sperm development,  
20 infertility and toxicology.

## 1 Introduction

2

3 Nuclei are complex, dynamic structures within a cell. For many cell types, the nucleus is  
4 generally spherical, but for other cell types the nucleus adopts a distinctive shape [1]. One of  
5 the most profound changes to nuclear shape occurs during spermatogenesis: mammalian  
6 sperm tend to have a spatulate, or 'paddle' shape, meaning the nucleus both condenses and  
7 reshapes. The chromatin becomes wound ~4-6 times more tightly than in metaphase,  
8 mediated via replacement of histones with smaller protamines [2], and various cytoskeletal  
9 elements coordinating to shape the nucleus [3].

10

11 In rodents, this process is even more elaborate: most rodents, including mice, have a  
12 falciform 'hook-shaped' sperm, with varying degrees of hook length and body shape  
13 between species (e.g. [4]). The mouse sperm head shape develops through a series of  
14 interacting mechanical forces, reshaping the nucleus via the cytoskeleton and  
15 nucleoskeleton. The sperm head is divided into developmental 'modules', each of which is  
16 shaped by particular cytoskeletal components [5]. When these processes go awry, distinct  
17 morphological abnormalities can result (e.g. [6]), linking phenotype with the underlying  
18 genetic alterations. The reshaping of the nucleus is itself a distinct process from the  
19 chromatin condensation and repackaging [3]. Reshaping precedes transition and protamine  
20 replacement, and chromatin condensation then follows.

21

22 Analytical methods for categorising and quantifying sperm head shape variation have  
23 developed markedly over the years, and the advent of computational processing of images  
24 has dramatically increased the quality of data we can capture, and the sophistication of the  
25 analyses. To date, morphometric approaches in sperm have fallen into three main groups;  
26 the measurement of basic parameters such as lengths, widths, and areas of objects, the use

1 of elliptic fourier analysis to investigate differences in the two dimensional outline of the  
2 object, and the use of Procrustes analyses to examine differences in fixed landmarks within  
3 the sperm head. Each of these approaches has advantages and disadvantages.

4

5 Basic measures such as area and length were the first statistics recorded describing sperm  
6 morphology (e.g. [7–9]). These still remain useful, especially in situations such as CASA  
7 analysis for fertility screening, in which an assessment of semen quality must be made  
8 rapidly across many different cells [10]. However, the parameters measured by these  
9 analyses are dominated by the size of the object, not the shape, and can make it difficult to  
10 consistently assess the number of normal sperm across populations [11].

11

12 In contrast, elliptic Fourier descriptors [12] allow an arbitrary closed two dimensional shape  
13 to be decomposed into harmonic amplitudes describing the curvature of the object  
14 perimeter, thus allowing subtle variations in shape to be discovered [13]. This approach has  
15 proved powerful for demonstrating differences between species, lines within a species, and  
16 different treatments (e.g. [14–16]). However, the approach has the drawback that the shape  
17 parameters and underlying mathematics are difficult for biologists to understand and relate  
18 back to the biological structure that is affected [17]. Moreover, since Fourier analyses rely on  
19 smooth harmonic deformations of an underlying elliptical outline, sharp points - such as  
20 found at the tip of a mouse sperm - tend to be poorly fitted [18].

21

22 The third major method, Procrustes-based geometric morphometric analysis, uses  
23 landmarks and semilandmarks within the object to align individual samples to consistent  
24 size, position and orientation (e.g. [4]). Principal component analysis (PCA) can then be  
25 used to identify the major varying landmarks distinguishing samples [5]. This approach has  
26 the advantage of tightly relating the variation to physical structures within the object:  
27 however, since objects are aligned by a least-squares method rotating about the centroid,

1 objects are susceptible to smearing of landmarks in highly variable regions, and can require  
2 time-consuming manual placement of landmarks.

3

4 In terms of the biological field of application, sperm shape analysis has proven useful in  
5 three main interrelated areas: infertility, speciation, and toxicology. In infertility, while  
6 abnormal sperm morphology is extremely common in infertile knockout lines, the role played  
7 by specific types and extents of shape defect remains to be elucidated, as does the extent to  
8 which teratozoospermia can be used as an indicator of other sperm defects (e.g. DNA  
9 damage or defective motility [19]). Deregulation of reproductive processes is a major  
10 contributor to speciation through the induction of hybrid male sterility [20]. In particular,  
11 sperm shape abnormalities are a feature of house mouse hybrid sterility, with a range of  
12 mapped quantitative trait loci known, particularly on the sex chromosomes but also on  
13 autosomes [21–24].

14

15 Sperm shape is used as an assessment of genotoxicity and/or reproductive toxicity of  
16 compounds (e.g. [25,26]). These studies often carry out a manual classification of sperm into  
17 various categories of morphological abnormality, based on previously described sperm  
18 shapes. The manual element thus makes this application both time consuming, and prone to  
19 operator bias. A further problem is that the classes of abnormality described are often  
20 arbitrarily chosen, and vary between studies. Use of a scoring chart, based on the  
21 morphological abnormalities typical for one experimental system, may therefore compromise  
22 the ability to quantitate abnormalities in a different system. It would be far more useful to  
23 have an automated and reproducible method that is able to discover categories of  
24 morphological abnormality within a sperm population, without prior training.

25

26 To address these needs for unbiased measurement, analysis and categorisation of nuclear  
27 morphologies, we have developed a new image analysis programme that generates

1 quantitative information on the underlying regions of the nucleus that differ within and  
2 between samples, independent of nuclear size.  
3  
4 We have validated the software on different mouse lines, and can quickly analyse hundreds  
5 of images. Here, we demonstrate the use of this software to compare a range of different  
6 inbred, outbred and wild-derived lines (revealing the effects of inbreeding depression and  
7 potentially hybrid dysgenesis), to unravel the morphological variation in a single sample  
8 (revealing different classes of abnormality in an inbred line), and to trace genetic influences  
9 on sperm morphology in a reciprocal F1 cross between CB57Bl6 and CBA lines (revealing  
10 contrasting effects of the parental genomes on sperm size and shape).

## 1 **Methods**

### 2 *Mouse lines*

3 All animal procedures were in accordance with the United Kingdom Animal Scientific  
4 Procedures Act 1986 and the University of Montana Institute for Animal Care and Use  
5 Committee (protocol 002-13) and were subject to local ethical review. Animals were sourced  
6 as indicated in Table 1; either from an approved supplier (Charles River Laboratories,  
7 Manston, UK), bred at Cambridge University Central Biomedical Services (Home Office  
8 licenses 80/2451 and 70/8925 held by PE), or bred at the University of Montana. Breeding  
9 colonies at the University of Montana were established from mice purchased from Jackson  
10 Laboratories (Bar Harbor, ME) or were acquired from Francois Bonhomme (University of  
11 Montpellier). Animals were housed singly or in small groups, sacrificed via CO<sub>2</sub> followed by  
12 cervical dislocation (UM) or only cervical dislocation and tissues collected *post mortem* for  
13 analysis.

14

| Line Name | Sample ID | Note                                                         | Samples Imaged                             | Source |
|-----------|-----------|--------------------------------------------------------------|--------------------------------------------|--------|
| C57Bl6/J  | C57Bl6    | Inbred                                                       | 2 individual animals<br>(C57 3, 4)         | CRL    |
| CBA/Ca    | CBA       | Inbred                                                       | 3 individual animals<br>(CBA1, 2, 3)       | CRL    |
| B6CBA     | B6CBA     | F1 offspring of<br>C57Bl6 (f) and<br>CBA (m) inbred<br>lines | 3 individual animals<br>(B6CBA 1, 2, 4)    | CRL    |
| CBAB6     | CBAB6     | F1 offspring of<br>CBA (f) and<br>C57Bl6 (m)<br>inbred lines | 4 individual animals<br>(CBAB6 1, 2, 3, 4) | CRL    |
| CD1       | CD1       | Outbred                                                      | 1 pool of 15 males                         | CRL    |
| DBA/1J    | DBA       | Inbred                                                       | 2 individual animals<br>(DBA 1, 2)         | CRL    |

|                      |                         |                                                   |                                                     |                        |
|----------------------|-------------------------|---------------------------------------------------|-----------------------------------------------------|------------------------|
| BALB/cAnN Crl        | BALB/c                  | Inbred                                            | 2 individual animals (Balbc 1, 2)                   | CRL                    |
| FVB/N                | FVB                     | Inbred                                            | 2 individual animals (FVB 1, 2)                     | CRL                    |
| MF1Y <sup>RIII</sup> | MF1Y <sup>RIII</sup>    | Outbred                                           | 2 pools (MF1Y <sup>RIII</sup> 1, 2) of 8 males each | Bred at Uni. Cambridge |
| LEWES/EiJ            | <i>M. m. domesticus</i> | <i>M. m. domesticus</i><br>Wild-derived<br>inbred | 2 pools (LEW 1, 2) of 2 males each                  | Bred at Uni. Montana   |
| PWK/PhJ              | <i>M. m. musculus</i>   | <i>M. m. musculus</i><br>Wild-derived<br>inbred   | 2 pools (PWK 2, 3) of 2 males each                  | Bred at Uni. Montana   |
| STF                  | <i>M. spretus</i>       | <i>M. spretus</i><br>Wild-derived<br>inbred       | 2 pools (STF 1, 2) of 2 males each                  | Bred at Uni. Montana   |

1 Table 1: Mouse lines analysed for this study. CRL; Charles River Laboratories, Manston,  
2 UK.

### 3 *Sperm collection and fixation*

4 The vasa deferentia and caudae epididymes were dissected from each animal, and the  
5 contents squeezed out into 1ml PBS (scaled up accordingly if multiple animals were pooled).  
6 The sperm were transferred to a microfuge tube, and tissue clumps were allowed to settle.  
7 Sperm were transferred to a new tube and pelleted at 500g for 5mins. The supernatant was  
8 removed, and the sperm fixed dropwise with either 3:1 methanol-acetic acid or 2%  
9 paraformaldehyde (PFA) in PBS. Sperm were again pelleted at 500g for 5mins, and washed  
10 in fixative twice more. Samples were stored at -20°C (methanol-acetic acid) or 4°C (PFA).

11

### 12 *Imaging*

13 Samples were diluted in fixative as required to obtain an evenly-spread preparation, and 8µl  
14 of sample dropped onto a slide and allowed to air dry. Slides were counterstained with 16µl  
15 VectorShield with DAPI (Vector Labs) under a 22x50mm cover slip and imaged at 100x on  
16 an Olympus BX-61 epifluorescence microscope equipped with a Hamamatsu Orca-ER



1 C4742-80 cooled CCD camera and appropriate filters. Images were captured using Smart-  
2 Capture 3 (Digital Scientific UK). To validate the reproducibility of the software, sample  
3 images were also gathered on three other microscopes: (1) an Olympus BX61 with a  
4 Hamamatsu C10600 orca r<sup>2</sup> camera, (2) an Olympus BX61 with a Hamamatsu Orca-03G  
5 camera, and (3) a Nikon Microphot-SA epifluorescence microscope with a Photometrics  
6 Metachrome II CH250 cooled CCD camera.

7

### 8 *Nucleus detection and morphological analysis*

9 Image analysis was performed using a custom program designed as a plugin for the freely  
10 available image analysis program ImageJ [27]. The plugin, Nuclear Morphology Analysis.  
11 The core software was developed using Java 8, with the user interface written using Swing.  
12 The software is available at [http://bitbucket.org/bmskinner/nuclear\\_morphology/wiki/Home/](http://bitbucket.org/bmskinner/nuclear_morphology/wiki/Home/)  
13 together with full installation instructions, an online wiki user manual, and example images  
14 for testing. The analyses described here were conducted using software version 1.13.6. The  
15 program allows for (a) detection of objects within fluorescence images and (b) morphological  
16 analysis of objects as sperm nuclei using a species-specific set of rules for identifying  
17 biologically relevant structures. The detection strategy is outlined in the supplementary  
18 methods.

19

20 Once nuclei were acquired from a set of images, they were consistently oriented and  
21 aligned. We used a modification of the Zahn-Roskies (ZR) transform [28] to 'unroll' the  
22 outline of each sperm nucleus by measuring the interior angle of the sperm at each point  
23 around the nuclear perimeter to generate a linear trace we refer to as the angle profile  
24 (Figure 1); further details and validation of the robustness of the method are given in the  
25 supplementary data and Supplementary figures 1-11.

26

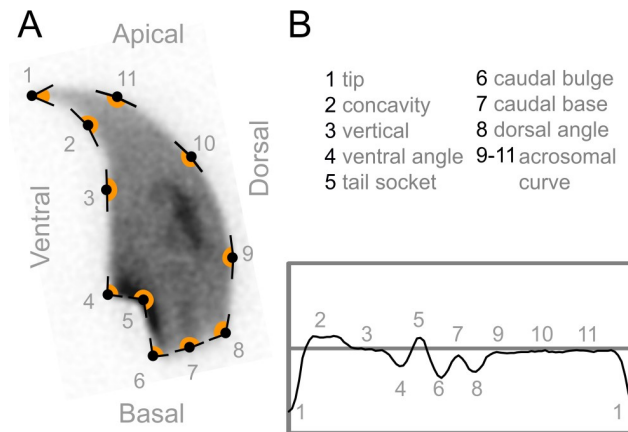

1

2 *Figure 1: Shapes are detected by measuring the internal angles around the periphery of the*  
3 *nucleus. Angles from key features in an example nucleus (A) are plotted in (B). The actual*  
4 *profile for the entire perimeter is shown in (C).*

#### 5 *Statistical analysis and clustering*

6 Following segmentation, standard nuclear parameters were measured: area, perimeter and  
7 aspect ratio, the width of the nuclear body versus the length of the hook as described in  
8 other papers (e.g. [9]), and the lengths of each perimeter segment. Data was exported for  
9 further processing in R. Differences between datasets were tested using a pairwise Wilcoxon  
10 rank sum test, with Bonferroni multiple testing correction. In order to quantify the variability of  
11 the nuclear shapes, we developed a new per-nucleus measure defined as the root-mean-  
12 square difference between the per-nucleus angle profile and the median angle profile for the  
13 dataset, averaged across the length of the angle profile. The coefficient of variability  
14 (standard deviation / mean) was also calculated for each of the other measured parameters.

15

16 The 'average shape' of the nuclei was calculated by averaging the x and y coordinates at  
17 consistent semilandmarks taken as fractions of the perimeter across all nuclei, vertically  
18 aligned and with their centres of mass at (0,0). This yielded a 'consensus nucleus'  
19 visualising the overall shape of the population. Clustering was implemented via the WEKA  
20 data mining software library [29].

## 1 **Results**

### 2 *Detection and quantification of sperm shape in C57Bl6 and CBA mice*

3 The difference between CBA and C57Bl6 sperm is distinguishable to the trained eye, and  
4 makes a useful demonstration of the software's features. The angle profiles generated are  
5 distinct for each genotype (Figure 2A). CBA sperm have a larger cross-sectional area, are  
6 longer, and also have slightly shorter hooks than C57Bl6 sperm (Figure 2B/C). These  
7 differences are reflected in the profiles; the long narrow tail in the CBAs appears as a  
8 smooth curve at  $x=50$  in the profile, while the shorter, wider C57Bl6s show a distinct dip  
9 corresponding to the sharper curve of the dorsal angle before the acrosome. The shorter  
10 hook of the CBAs is also seen as a narrow peak at  $x=10$ ; the longer hook of the C57Bl6s  
11 has a correspondingly wider peak. Automated segmentation of the nuclear profile allows  
12 quantification and significance testing of the inter-line differences in each separate region of  
13 the nuclear profile (see Supplementary figures 4, 5, 14).

14

15 CBA and C57Bl6 have previously been characterised by Wyrobek et al [9], who measured  
16 160 nuclei of each genotype by manual tracing of projected microscope images of eosin-  
17 stained sperm heads. We found our measured values to be similar (Supplementary Table 7)  
18 but slightly smaller - as expected given that their measurements are for the entire sperm  
19 head rather than just the nucleus. The body widths are within  $0.3\mu\text{m}$ , and our bounding  
20 heights are approximately  $1.2\mu\text{m}$  smaller, consistent with our measurements lacking the  
21 acrosomal cap ( $\sim 0.15\mu\text{m}$  [30]), and the proteinaceous part of the sperm hook. We measured  
22 the CBAs to be 12% longer than the C57Bl6s, again close to the previously published  
23 13.5%.

24

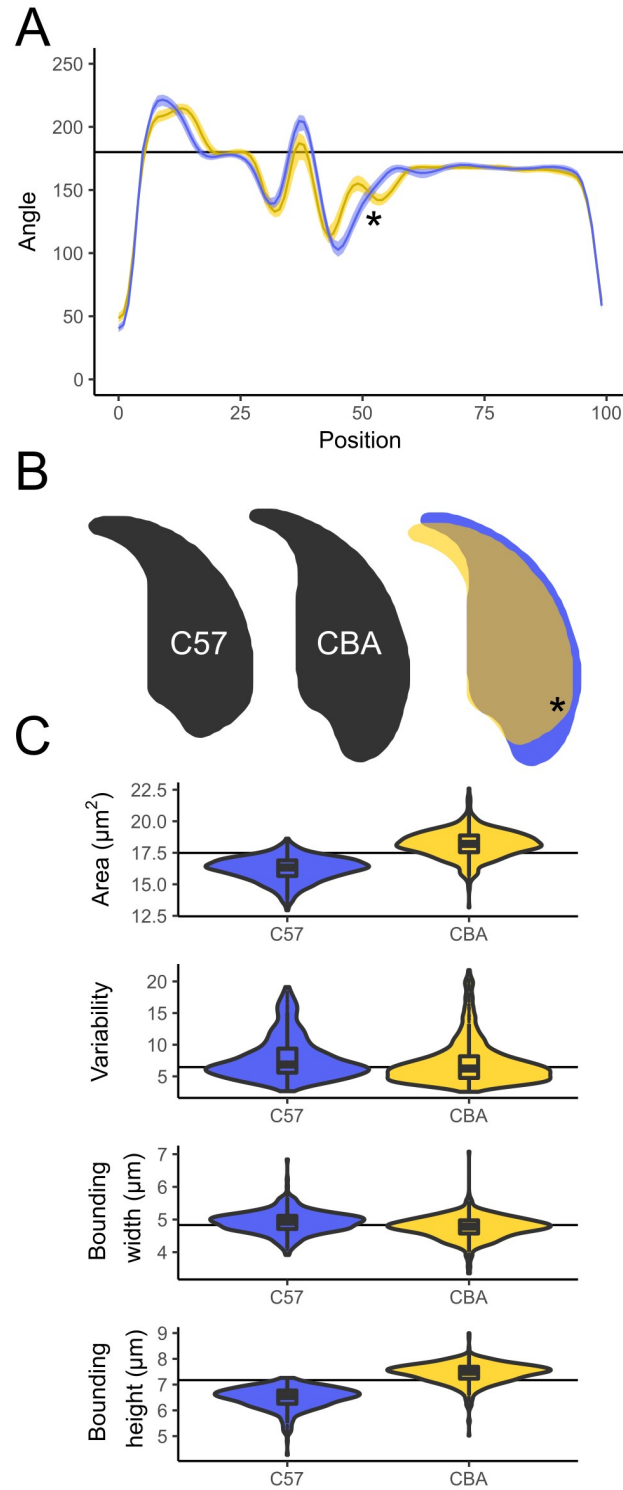

1

2 *Figure 2: A) Comparison of shape profiles between C57Bl/6 (yellow) and CBA (blue),*  
3 *showing the median and interquartile range of the nuclear shape profiles. B) Consensus*  
4 *nuclei from each population, and the overlap showing the regions differing. C) Size and*  
5 *shape measurements between the lines. The prominent dorsal angle in C57Bl/6 nuclei is*  
6 *marked with an asterisk.*

1 *Comparison of sperm morphology and variability across lines demonstrates the effects of*  
2 *inbreeding depression and hybrid dysgenesis*

3 With the software tested on CBA and C57Bl6, we wanted to investigate the extent to which  
4 sperm shape variability within and between lines is affected by two factors: inbreeding  
5 depression and the complex inter-subspecific mosaic origin of classical laboratory strains.  
6 We selected a panel of inbred laboratory lines and compared them to (a) outbred laboratory  
7 lines, and (b) wild-derived inbred lines (Table 1). Biological replicate samples from the inbred  
8 lines represent either single animals (lab lines) or a pool of two animals (wild-derived inbred  
9 lines). For the outbred lines, several individuals were pooled to ensure we were capturing  
10 the diversity of the population as a whole.

11

12 Variability within each line was assessed using a new measure based on the similarity of  
13 each cell's angle profile to the median for that line (see Methods). This was found to  
14 correlate well with other population measures of variability such as the coefficients of  
15 variation for area, bounding height and perimeter (Supplementary table 1). A comparison of  
16 the overlaid average nuclear shape is shown in Figure 3. In addition to each line having a  
17 characteristic sperm morphology, different lines showed different levels of intra-sample  
18 variability. A breakdown by biological replicates shows that these data reflect true line  
19 differences rather than biological differences between individual animals or technical  
20 differences between imaging sessions or choice of fixative (Supplementary figures 9-11).

21

22 The BALB/c mice have the most variable shape profiles of all the lines we analysed, as well  
23 as the highest coefficient of variability in area, height and width (Supplementary tables 1, 2).

24 The other inbred laboratory lines all showed low intra-line variability despite the fact that  
25 there were marked differences in sperm size and shape between lines. Of the inbred  
26 laboratory lines tested, CBA and DBA had the lowest intra-sample variability. The two  
27 outbred lines, CD1 and MF1Y<sup>RIII</sup> both showed slightly higher intra-sample variability. This

- 1 may reflect the fact that these samples were pooled samples derived from multiple
- 2 genetically unique individuals. Turning to the wild-derived lines, all three lineages analysed
- 3 (*M. m. domesticus*, *M. m. musculus* and *M. spretus*) had lower variability than any of the
- 4 standard laboratory lines, despite that fact that these wild-derived lines are inbred.
- 5

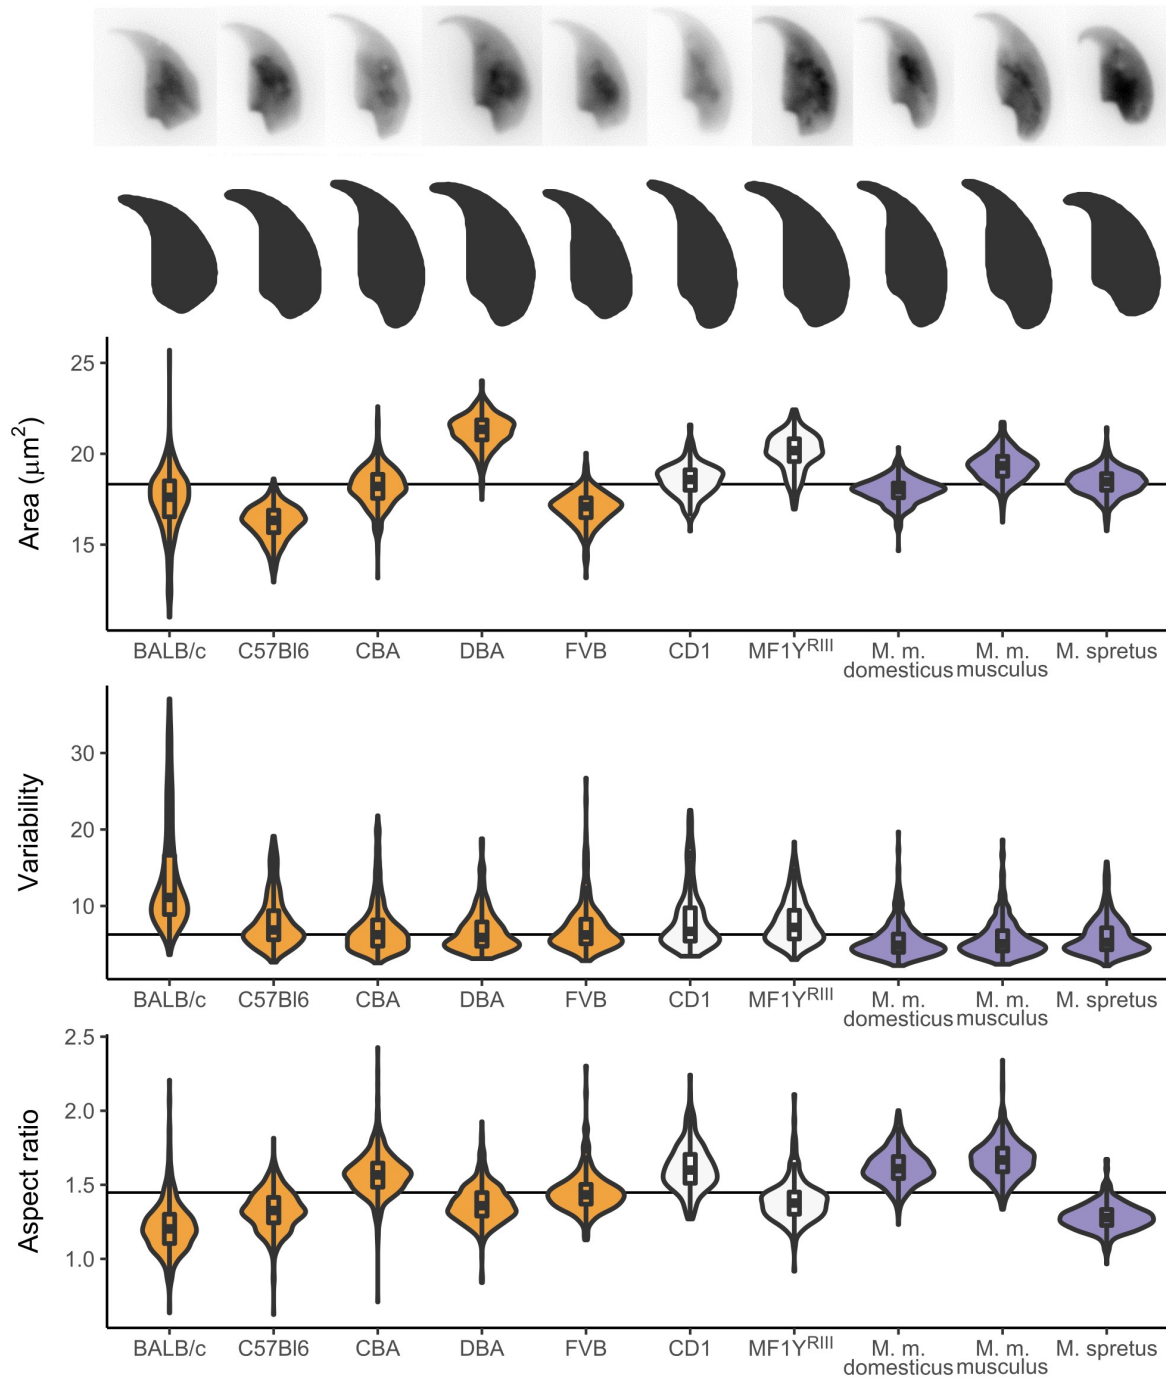

6

1 *Figure 3: Parameters for additional lines examined, with representative nuclei and population*  
2 *consensus. Samples are coloured according to their type: from left to right: inbred (yellow),*  
3 *outbred (white) and inbred wild-derived (blue).*  
4

5 *Segmentation of sperm profiles allows detailed analysis of elements of sperm morphology*

6 Once “unrolled” into an angle profile, this profile can then be segmented at local minima and  
7 maxima (see Methods) to identify specific landmarks within the sperm head shape. Some  
8 landmarks are consistently found across all lines, such as the tip of the apical hook and the  
9 point of maximum curvature at the base of the sperm head, while other landmarks such as  
10 the dorsal angle and the indentation at the tail attachment site are variable between lines. As  
11 an example of how this can be used to compare samples, since we had already found the  
12 presence of a dorsal angle to vary between CBA and C57Bl6 sperm, we examined how this  
13 varied across the full data set. Of all the lines studied, only five showed a clear dorsal angle,  
14 with the others having a smoother profile posterior to the acrosome. The distance from the  
15 rear reference point to the dorsal angle was characteristic for each of these five lines, as was  
16 the variability in this measurement, with BALB/c mice showing highest variability.  
17 Supplementary Figure 15 discusses the ubiquitous and variable landmarks discovered by  
18 the segmentation analysis and shows the detailed segmentation pattern for each line, while  
19 Supplementary Table 4 gives the numerical segment length data for each line.  
20

21 *C57Bl6 / CBA F1 cross males demonstrate the effects of each parental genotype on sperm*  
22 *shape and the relief of inbreeding depression by heterosis.*

23 The differences we saw between inbred and outbred laboratory lines made us curious as to  
24 the impact of line background and genetic interactions thereof. We investigated one specific  
25 reciprocal F1 cross, between C57Bl6 and CBAs. The use of F1 animals is important here as  
26 it relieves the effects of inbreeding depression caused by fixation of deleterious recessive  
27 variants in each of the parental lines, but still yields a uniform population of genetically

1 identical males from each cross. B6CBA mice are the F1 offspring of a female B6 with a  
2 male CBA and CBAB6 mice are the reciprocal cross. Sperm morphology for both F1 lines  
3 matches the CBA parental line closely, indicating a dominant effect of the CBA genotype  
4 (Figure 4A). In terms of sperm cross-sectional area, both types of F1 sperm are much more  
5 similar to the CBA parent, while being fractionally larger than either parental line (Figure 4B).  
6 Males from both directions of the F1 cross showed less variability in their sperm shape  
7 compared to either parent line, suggestive of a degree of heterosis in the F1s.

8

9 The reciprocal cross data allows us to look for parent-of-origin effects on sperm shape. We  
10 found two such differences, in sperm cross-sectional area and in bounding width. CBAB6s  
11 have a slightly larger sperm area than the B6CBAs (19.3 square microns versus 18.6 square  
12 microns,  $p < 0.001$ ) and the region around the posterior of the nucleus is widened in the  
13 CBAB6s, intermediate to CBA and C57Bl6 (Figure 4B/C). The differences around the  
14 posterior are largely driven by changes in the dorsal angle, which is present in C57, absent  
15 in CBA, and virtually absent in both reciprocal F1 cross males (Figure 4D). For bounding  
16 width, we find that this parameter is influenced by the male parent: CBAB6 and B6CBA are  
17 significantly different to each other ( $p = 0.0016$ ), as are C57Bl6 and CBA ( $p = 1.27E-12$ ), but  
18 there is no significant difference between C57Bl6 and CBAB6 ( $p = 0.18$ ) or between CBA and  
19 B6CBA ( $p = 0.095$ ). This suggests that this aspect of sperm shape may be influenced either  
20 by sex chromosome or mitochondrial background or by autosomal imprinted loci.

21



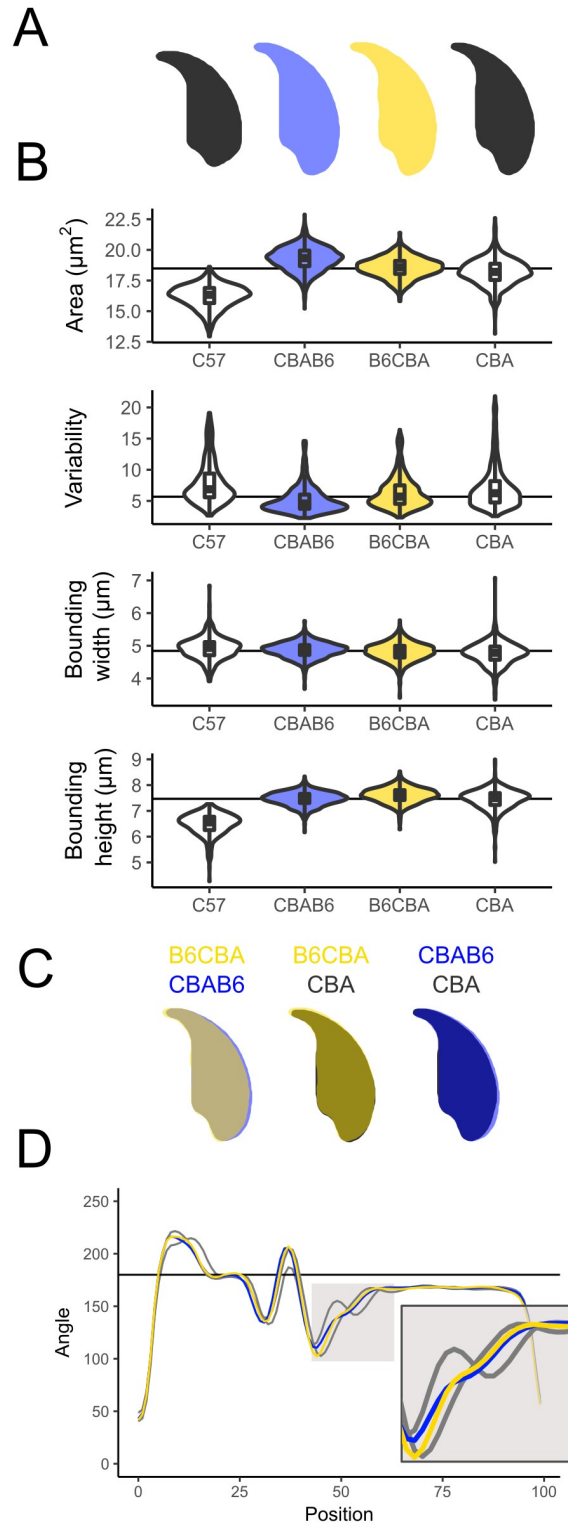

1

2 *Figure 4: Subtle differences can be seen between a CBAB6 (CBA mother) and a B6CBA*  
 3 *(C57BI6 mother). Both are intermediate to the parental shapes, but CBAB6 sperm are wider,*  
 4 *and their shape is closer to that of the C57BI6. A) Consensus nuclei B) Size measurements;*  
 5 *C) Overlay of consensus nuclei; D) comparison of angle profiles; the tail attachment region is*  
 6 *expanded in the inset.*

1 *Hierarchical clustering can separate samples based on shape differences*

2 Next, we turned our attention to the analysis of morphological variation within a given  
3 population. In particular, we considered that cluster analysis of the sperm from a single  
4 sample would give an unbiased breakdown of the different morphological sub-populations  
5 contained therein. We used a hierarchical clusterer, as implemented by the WEKA data  
6 mining tool [29] to separate sperm based on their shape profiles.

7

8 We tested the clustering algorithm by pooling images from C57Bl6 and CBA and analysing  
9 them as a single sample. Since C57Bl6 and CBA sperm are slightly different sizes, the  
10 simplest partitioning of the mixed set is a binary cut-off at a given threshold for nuclear area.  
11 Passing the nuclear areas to a hierarchical clusterer and selecting the two most distinct  
12 clusters using the Ward clustering method was 83-85% accurate at separating the individual  
13 sperm by line. To determine whether shape-based hierarchical clustering could improve  
14 upon this, we sampled values from the angle profile for each nucleus at regular intervals  
15 (corresponding to the original window proportion) and provided these as inputs to the  
16 clustering algorithm. This clustering was markedly more accurate than a simple size-based  
17 cut-off, and separated the two genotypes with 91-95% success (Supplementary table 6). In  
18 head-to-head tests using a representative subset of 50 nuclei from each genotype, the  
19 clusterer performed at least as well (96%) as experienced assessors (97% accuracy), and  
20 substantially better than novice assessors (75% accuracy) (Supplementary figure 12).

21

22 *Hierarchical clustering can detect morphological subgroups within a sample*

23 Having demonstrated that cluster analysis can recover different shapes from a mixed  
24 population of known composition, we looked at its use for novel shape discovery within a  
25 single highly variable population. Since the BALB/c line showed the highest variability in our  
26 line survey, we chose this as our test sample. A cluster analysis based on angle profile alone

1 found four major groups of sperm shape, from mostly normal through to severe hyper-  
2 condensation of the sperm (Figure 5). The final class is still highly variable compared to the  
3 other classes; clustering these nuclei further reveals a separation of two separate types of  
4 hypercondensation (Supplementary figure 16) as previously described [31]. While the most  
5 normal sperm had near-normal placement of the dorsal angle, and a normal tail attachment  
6 site, the most heavily distorted sperm showed frequent presence of additional sharp angles  
7 in the sperm outline, effacement of the tail attachment site due to compression of the rear of  
8 the sperm head, and an ever more prominent and misplaced dorsal angle that may reflect  
9 altered microtubule dynamics during nuclear shaping (see Discussion).

10

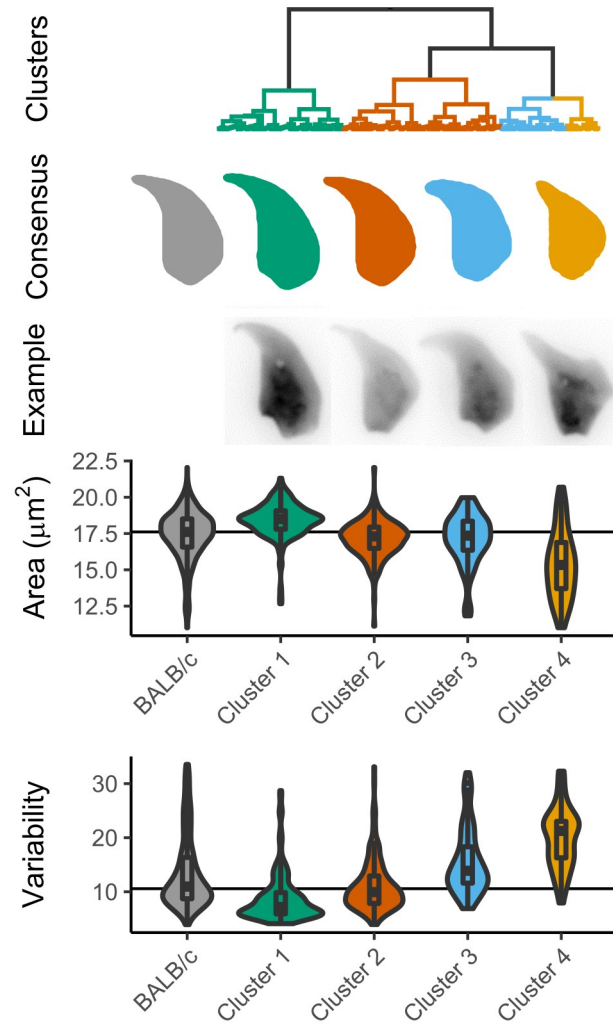

1

2 *Figure 5: The overall population of BALB/c sperm appears distorted compared to other lines*  
3 *(grey), but clustering reveals separate classes of morphology, from mostly normal (green) to*  
4 *highly condensed (yellow).*

5

## 1 **Discussion**

2

3 We present here a morphological analysis tool designed to study nuclear morphology, with  
4 the ability to automatically identify key landmarks in the nuclear outline and quantitatively  
5 measure a range of nuclear and sub-nuclear parameters. Here, we demonstrate the use of  
6 this software to analyse the highly asymmetrical shape of the mouse sperm nucleus;  
7 however it is a generally applicable tool suitable for analysis of all sizes and shapes of  
8 nuclei.

### 9 *Comparison of this method with other nuclear shape analysis methods*

10 The key advantage offered by the software presented here is automation of the steps  
11 involved in object detection, shape decomposition and comparison. At the object detection  
12 stage, we use an edge detection algorithm that is markedly more effective than the fixed-  
13 threshold detection used in other packages, particularly in the presence of inhomogeneous  
14 staining of the bright chromocenter and dim apical hook. At the shape decomposition step,  
15 we introduce a modification of the Zahn-Roskies transform [28] that sensitively detects the  
16 various angular landmarks around the sperm periphery without the need for manual  
17 intervention. Together, these innovations massively increase the number of nuclei that can  
18 be quantified and compared to each other, with a total of 8,749 nuclei being measured  
19 during this study. This for the first time permits the use of sample sizes that accurately  
20 capture not only fixed size and shape differences between samples, but also the detection  
21 and classification of intra-sample variability. Our method is robust to differences between  
22 camera and microscope setups and fixation techniques, making it amenable to analysis of  
23 large numbers of images, and potentially to automated image capturing from whole slide  
24 scanners.

25

1 While there are other features of sperm morphology that we do not yet address in this  
2 package, the modular design of our software allows additional analysis pipelines to be added  
3 at a subsequent date, and for features from different fluorescence channels to be associated  
4 with specific nuclei and analysed in relation to them. We anticipate that other sperm  
5 morphological features such as the extent and thickness of the acrosome, the proteinaceous  
6 tip of the hook, the presence of cytoplasmic droplets, and the length and morphology of the  
7 tail will be amenable to our approach by combining nuclear staining for orientation with  
8 phase contrast imaging, tubulin immunostaining, MitoTracker, SpermBlue or other stains.  
9 Since we are imaging fixed cells, the nuclei also remain available for interrogation by  
10 chromosome painting or other molecular cytogenetic approaches, e.g. to detect aneuploid  
11 cells and correlate their chromosomal status with their nuclear morphology.

#### 12 *Comparison of sperm shape within and between lines*

13 Our observations support previous studies (e.g. [4,9]), add further information on the precise  
14 regions of the sperm head that differ between lines, and demonstrate the variability of  
15 sperm morphology within each given line. In particular, we examined the presence and  
16 placement of the dorsal angle of the sperm. This feature is created by pressure from the  
17 manchette: a cone-shaped array of microtubules that forms behind the nucleus and slides  
18 backwards during spermiogenesis, shaping the rear of the sperm head in the process.  
19 Defects in katanin p80, a microtubule severing protein, lead to failure of this process and  
20 abnormal compression of the base of the sperm head [6]. The narrowing of the tail  
21 attachment site seen in FVB and BALB/c males, together with the prominent dorsal angle  
22 seen in both lines (especially the latter) may indicate that manchette migration is abnormal in  
23 these males.

1

## 2 *Comparison of sperm variability within and between lines*

3 The greatest variability we saw was in the BALB/c animals. This line is known to have poor  
4 sperm morphology and high levels of sperm aneuploidy. Kishikawa et al [31] observed  
5 different classes of abnormality, which we were able to recapitulate. In their analysis, the  
6 authors found chromosomal abnormalities in 35% of highly abnormal sperm, but also in 15%  
7 of sperm that were morphologically 'normal' by their criteria. Given that our new analysis  
8 detects additional classes of more subtle shape difference that were not discriminated in the  
9 earlier analysis, we hypothesise that these new abnormal classes may also be enriched for  
10 chromosomal defects compared to the most normal sperm. Further differences await  
11 characterisation: different classes and levels of sperm abnormalities have been described  
12 depending on the particular subline and age of the animal [32].

13

14 Consistent with [33], we found that an F1 cross between C57Bl6 and CBA laboratory lines  
15 lowered sperm shape variability (see below), suggestive of a degree of inbreeding  
16 depression that was relieved by heterosis. However, the least variable lines we examined  
17 were the wild-derived inbred lines PWK, LEW and STF, representing *M. m. musculus*, *M.m.*  
18 *domesticus* and *M. spretus* respectively. Since these three lines are also inbred, this  
19 suggests that the wide variety of sperm shapes in laboratory lines, and the elevated level of  
20 intra-individual variability in all the laboratory lines is not primarily a consequence of  
21 inbreeding depression.

22

23 Instead, this is potentially linked to the status of the laboratory mouse as a hybrid between  
24 several mouse subspecies - a factor that may have disrupted regulatory interactions  
25 throughout the genome. Against this, PWK, despite being predominantly of *musculus* origin,  
26 nevertheless has substantial introgression of *domesticus* DNA, of the order of ~6-7% of the  
27 genome [34,35]. The degree of disruption may therefore depend on both the direction of

1 introgression and the specific regions involved. The recent finding of polymorphic hybrid  
2 incompatibilities within both *musculus* and *domesticus* subspecies shows that multiple  
3 regions of the genome contribute to hybrid breakdown and hybrid sterility. Consequently, the  
4 various different classical and wild-derived inbred lines may have fixed different  
5 combinations of incompatible alleles that collectively destabilise sperm development to  
6 varying extents in each line [36].

7

8 X/Y mismatch is a strong potential contributor to regulatory disruption, since most laboratory  
9 lines carry a *musculus* Y on a predominantly *domesticus* background [34]. The copy number  
10 of the ampliconic genes on the X and Y chromosomes varies markedly between *musculus*  
11 and *domesticus* subspecies, and the relative copy number of these genes is known to be  
12 important for normal sperm morphology [37–39]. However, while most of the laboratory lines  
13 we examined do indeed have mismatched X/Y chromosomes [34,40,41], the FVB X and Y  
14 are both of *domesticus* origin, indicating that the alterations in sperm shape in this line are  
15 not due to X/Y mismatch.

16

17 An alternative but not mutually exclusive explanation for the difference between classical  
18 laboratory inbred lines and wild-derived inbred lines is that the classical lines have been  
19 selected over multiple generations for their ability to breed well in captivity - indeed FVB is  
20 particularly known for its fecundity [42]. It may seem paradoxical that selection for high  
21 fecundity could adversely affect male fertility parameters: however, under laboratory  
22 conditions of non-competitive mating, co-housing a single male with one or more females, it  
23 is likely that reproductive output is driven largely by maternal factors. Thus, even though  
24 laboratory lines are fertile under lab breeding conditions, their sperm may be uncompetitive  
25 in mixed mating experiments compared to a pure species background. The morphology of  
26 the FVB zygote pronucleus is independent of the paternal genetic background, and the  
27 efficiency of FVB sperm for IVF appears unexceptional [43]. Sperm morphology and  
28 fertilisation success in laboratory mice has been shown to evolve rapidly in response to



1 competitive mating experiments, indicating that the baseline competitive ability of laboratory  
2 line sperm is sub-optimal [44,45]. Intriguingly, it has even been shown that in lines  
3 experimentally selected for high fecundity, male fertility and sperm morphology/motility  
4 parameters are compromised, suggestive of a trade-off between the male and female factors  
5 necessary for high fecundity in a laboratory environment [46].

6

### 7 *Relevance for speciation, fertility, and toxicology studies*

8 Abnormal sperm head morphology has emerged as a common form of hybrid male sterility in  
9 mice [21–24,47]. Some sterility factors broadly impair spermatogenesis, resulting in reduced  
10 sperm counts, lower motility, and abnormal morphology. However, several studies have now  
11 shown that hybrid sterility QTL in mice often correspond to specific reproductive phenotypes  
12 [24]. The challenges of manually quantifying morphology in large mapping panels has  
13 necessitated the use of crude categorical scores [21,23,47], hampering quantitative  
14 precision and likely limiting the ability to draw causal links between hybrid incompatibilities  
15 and specific aspects of sperm morphological development.

16

17 Our approach assists in two ways: firstly by enabling more rigorous quantitation of sperm  
18 shape, and secondly by enabling the large sample sizes and systematic approach needed  
19 for mapping studies. As a proof of principle, we have compared males from a reciprocal  
20 cross between C57Bl6 and CBA mice, and identified a dominant effect of the CBA genotype  
21 on sperm shape. Within this, however, there are subtle differences between the CBAB6 and  
22 B6CBA animals, suggesting an effect of either chromosome constitution or imprinting on  
23 sperm bounding width. This demonstrates the usefulness of this approach for understanding  
24 subtle features of mouse sperm nuclear development, and the potential to use this software  
25 for genetic mapping of the various determinants of mouse sperm head shape.

26

1 Fertility rate and IVF efficiency has been correlated with the genetic background of sperm  
2 among inbred mouse lines [48]. Furthermore, many studies have shown that the genetic  
3 background of a line can influence sperm morphology. For example, deletion of the long arm  
4 of the Y chromosome results in a more severe phenotype on B10.BR background than on  
5 CBA [49]. Mashiko et al [16] have suggested morphology of sperm is associated with  
6 fertilising efficiency in at least two mouse lines (B6D2F1 and C57Bl6/N). Since particular  
7 genetic mutations in mouse sperm shape are associated with characteristic nuclear shape  
8 abnormalities (e.g. [19]), detailed examination of sperm from natural mutant and/or targeted  
9 knockout animals may point to pathways of interest for understanding spermiogenesis and  
10 male fertility more generally.

11

12 In toxicological analysis, rodent sperm are conventionally manually classified into classes of  
13 predefined morphological abnormality (e.g. [26,50]). The hierarchical clustering implemented  
14 within the software is able to separate nuclei based on shape as accurately as an  
15 experienced manual sperm scorer; however it is much faster and more consistent. This may  
16 be of use in samples where the nature and degree of abnormalities is hard for humans to  
17 reliably quantify. It is also important to understand and quantify normal morphological  
18 variation between lines since different lines can have different responses to toxicological  
19 agents [51]. While many studies of toxicology using rodent models are conducted on rats,  
20 the extra information available in the mouse sperm head still makes them a useful model  
21 system. The fact that specific genetic lesions cause specific shape changes means that the  
22 sperm shape might in principle give information not just about the presence/absence of  
23 toxicity but also its mode of action. This level of analysis would complement existing studies  
24 of sperm function, which, in clinical settings or in automated CASA platforms (e.g. [52]), is  
25 still lacking detailed morphological data [10].

26

## 1 **Conclusions**

2 We present a new software package for the rapid, high-throughput, replicable analysis and  
3 comparison of nucleus shape in mouse sperm. By using a range of mouse lines, we have  
4 demonstrated the ability of the software to discriminate subtle differences between lines, and  
5 to reproducibly separate the nuclei into morphological groups. This has applications for  
6 studies of speciation, fertility and understanding the impact of genotoxic compounds. The  
7 analysis steps are generalisable and will work on many symmetric or asymmetric shapes of  
8 nuclei including, but not limited to sperm from other species.

9

## 10 **Acknowledgements**

11 We thank the animal handling staff at the University of Kent, University of Cambridge,  
12 University of Montana and Charles River Laboratories. We also thank the experimental test  
13 subjects who volunteered to classify C57Bl6 and CBA sperm.

14

## 15 **Funding**

16 BMS was supported by the Leverhulme Trust (grant RPG337) and the Biotechnology and  
17 Biological Sciences Research Council (BBSRC, grant BB/N000129/1). EEPJ was supported  
18 by BBSRC training grant BB/L502443/1. PE and CCR were supported by HEFCE (University  
19 of Kent) and by the BBSRC (grant BB/N000463/1). JMG and ELL were supported by the  
20 Eunice Kennedy Shriver National Institute of Child Health and Human Development of the  
21 National Institutes of Health (R01-HD073439 and R01-HD094787) and the National Institute  
22 of General Medical Sciences (R01-GM098536). EEKK was supported by the National  
23 Science Foundation Graduate Research Fellowship Program under Grant No. (DGE-  
24 1313190).

25

## 1 **Competing Interests**

2 We have no competing interests.

## 3 **Authors' contributions**

4 Conceptualisation, BMS and PE; Methodology, BMS and PE; Software and Validation, BMS;  
5 Investigation, CCR, JB, EEPJ and GY; Data Curation and Formal Analysis, BMS and CCR;  
6 Visualisation, BMS; Supervision and Project Administration, PE; Writing - Original Draft,  
7 BMS and PE; Writing - Review and Editing, BMS, CCR, JMG, ELL and PE; Resources,  
8 JMG, ELL, EEKK, NA and PE; Funding Acquisition, NA and PE. All authors gave final  
9 approval for publication.

## 10 **References**

- 11 1. Skinner BM, Johnson EEP. 2017 Nuclear morphologies: their diversity and functional  
12 relevance. *Chromosoma* **126**, 195–212. (doi:10.1007/s00412-016-0614-5)
- 13 2. Patankar A, Parte P. 2017 Sperm Chromatin Compaction and Male Infertility. In *Male*  
14 *Infertility: Understanding, Causes and Treatment*, pp. 295–315. Springer, Singapore.  
15 (doi:10.1007/978-981-10-4017-7\_17)
- 16 3. Meistrich ML. 1993 Nuclear Morphogenesis during Spermiogenesis. In *Molecular*  
17 *Biology of the Male Reproductive System* (ed D de Kretser), pp. 67–97. San Diego,  
18 USA: Academic Press.
- 19 4. Varea Sánchez M, Bastir M, Roldan ERS. 2013 Geometric Morphometrics of Rodent  
20 Sperm Head Shape. *PLoS ONE* **8**, e80607. (doi:10.1371/journal.pone.0080607)
- 21 5. Medarde N, Muñoz-Muñoz F, López-Fuster MJ, Ventura J. 2013 Variational modularity  
22 at the cell level: insights from the sperm head of the house mouse. *BMC Evolutionary*  
23 *Biology* **13**, 179. (doi:10.1186/1471-2148-13-179)
- 24 6. O'Donnell L *et al.* 2012 An Essential Role for Katanin p80 and Microtubule Severing in  
25 Male Gamete Production. *PLoS Genet* **8**, e1002698.  
26 (doi:10.1371/journal.pgen.1002698)
- 27 7. Friend GF. 1936 Memoirs: The Sperms of the British Muridae. *Journal of Cell Science*
- 28 8. Cummins JM, Woodall PF. 1985 On mammalian sperm dimensions. *J. Reprod. Fertil.*  
29 **75**, 153–175.
- 30 9. Wyrobek AJ, Meistrich ML, Furrer R, Bruce WR. 1976 Physical characteristics of mouse  
31 sperm nuclei. *Biophys. J.* **16**, 811–825. (doi:10.1016/S0006-3495(76)85730-X)

- 1 10. Mortimer ST, van der Horst G, Mortimer D. 2015 The future of computer-aided sperm  
2 analysis. *Asian J Androl* **17**, 545–553. (doi:10.4103/1008-682X.154312)
- 3 11. Davis RO, Gravance CG. 1994 Consistency of Sperm Morphology Classification  
4 Methods. *Journal of Andrology* **15**, 83–91. (doi:10.1002/j.1939-4640.1994.tb01690.x)
- 5 12. Kuhl FP, Giardina CR. 1982 Elliptic Fourier features of a closed contour. *Computer*  
6 *graphics and image processing* **18**, 236–258.
- 7 13. Diaz G, Zuccarelli A, Pelligra I, Ghiani A. 1989 Elliptic Fourier analysis of cell and  
8 nuclear shapes. *Computers and Biomedical Research* **22**, 405–414. (doi:10.1016/0010-  
9 4809(89)90034-7)
- 10 14. Ostermeier GC, Sargeant GA, Yandell BS, Evenson DP, Parrish JJ. 2001 Relationship  
11 of Bull Fertility to Sperm Nuclear Shape. *Journal of Andrology* **22**, 595–603.  
12 (doi:10.1002/j.1939-4640.2001.tb02219.x)
- 13 15. Utsuno H, Miyamoto T, Oka K, Shiozawa T. 2014 Morphological alterations in  
14 protamine-deficient spermatozoa. *Hum. Reprod.* **29**, 2374–2381.  
15 (doi:10.1093/humrep/deu225)
- 16 16. Mashiko D, Ikawa M, Fujimoto K. 2017 Mouse spermatozoa with higher fertilization rates  
17 have thinner nuclei. *PeerJ* **5**, e3913. (doi:10.7717/peerj.3913)
- 18 17. Ostermeier GC, Sargeant GA, Yandell BS, Parrish JJ. 2001 Measurement of Bovine  
19 Sperm Nuclear Shape Using Fourier Harmonic Amplitudes. *Journal of Andrology* **22**,  
20 584–594. (doi:10.1002/j.1939-4640.2001.tb02218.x)
- 21 18. Zelditch ML, Swiderski DL, Sheets HD. 2012 *Geometric Morphometrics for Biologists: A*  
22 *Primer*. Academic Press.
- 23 19. de Boer P., Vries M., Ramos L. 2014 A mutation study of sperm head shape and motility  
24 in the mouse: lessons for the clinic. *Andrology* **3**, 174–202. (doi:10.1111/andr.300)
- 25 20. Shorter JR *et al.* 2017 Male Infertility Is Responsible for Nearly Half of the Extinction  
26 Observed in the Mouse Collaborative Cross. *Genetics* **206**, 557–572.  
27 (doi:10.1534/genetics.116.199596)
- 28 21. Oka A, Mita A, Sakurai-Yamatani N, Yamamoto H, Takagi N, Takano-Shimizu T,  
29 Toshimori K, Moriwaki K, Shiroishi T. 2004 Hybrid breakdown caused by substitution of  
30 the X chromosome between two mouse subspecies. *Genetics* **166**, 913–924.
- 31 22. Campbell P, Nachman MW. 2014 X–Y Interactions Underlie Sperm Head Abnormality in  
32 Hybrid Male House Mice. *Genetics* **196**, 1231–1240. (doi:10.1534/genetics.114.161703)
- 33 23. Good JM, Dean MD, Nachman MW. 2008 A Complex Genetic Basis to X-Linked Hybrid  
34 Male Sterility Between Two Species of House Mice. *Genetics* **179**, 2213–2228.  
35 (doi:10.1534/genetics.107.085340)
- 36 24. White MA, Stubbings M, Dumont BL, Payseur BA. 2012 Genetics and Evolution of  
37 Hybrid Male Sterility in House Mice. *Genetics* , genetics.112.140251.  
38 (doi:10.1534/genetics.112.140251)

- 1 25. Bakare AA, Okunola AA, Adetunji OA, Jenmi HB. 2009 Genotoxicity assessment of a  
2 pharmaceutical effluent using four bioassays. *Genet Mol Biol* **32**, 373–381.  
3 (doi:10.1590/S1415-47572009000200026)
- 4 26. Das S, Upadhaya P, Giri S. 2016 Arsenic and smokeless tobacco induce genotoxicity,  
5 sperm abnormality as well as oxidative stress in mice in vivo. *Genes and Environment*  
6 **38**, 4. (doi:10.1186/s41021-016-0031-2)
- 7 27. Abramoff MD, Magelhaes PJ, Ram SJ. 2004 Image processing with ImageJ.  
8 *Biophotonics Int* **11**, 36–42.
- 9 28. Zahn, CT, Roskies, RZ. 1972 Fourier descriptors for plane closed curves. *IEEE*  
10 *Transactions, Computers* , 269–281.
- 11 29. Hall M, Frank E, Holmes G, Pfahringer B, Reutemann P, Witten IH. 2009 The WEKA  
12 Data Mining Software: An Update. *SIGKDD Explor. Newsl.* **11**, 10–18.  
13 (doi:10.1145/1656274.1656278)
- 14 30. Lin Y-W, Hsu T-H, Yen PH. 2013 Mouse sperm acquire a new structure on the apical  
15 hook during epididymal maturation. *Asian J Androl* **15**, 523–528.  
16 (doi:10.1038/aja.2013.46)
- 17 31. Kishikawa H, Tateno H, Yanagimachi R. 1999 Chromosome Analysis of BALB/c Mouse  
18 Spermatozoa with Normal and Abnormal Head Morphology. *Biol Reprod* **61**, 809–812.  
19 (doi:10.1095/biolreprod61.3.809)
- 20 32. Ohta H, Sakaide Y, Wakayama T. 2009 Age- and substrain-dependent sperm  
21 abnormalities in BALB/c mice and functional assessment of abnormal sperm by ICSI.  
22 *Hum Reprod* **24**, 775–781. (doi:10.1093/humrep/den456)
- 23 33. Wyrobek AJ, Gordon LA, Burkhardt JG, Francis MW, Kapp RW, Letz G, Malling HV,  
24 Topham JC, Whorton MD. 1983 An evaluation of the mouse sperm morphology test and  
25 other sperm tests in nonhuman mammals: A report of the U.S. environmental protection  
26 agency Gene-Tox program. *Mutation Research/Reviews in Genetic Toxicology* **115**, 1–  
27 72. (doi:10.1016/0165-1110(83)90014-3)
- 28 34. Yang H *et al.* 2011 Subspecific origin and haplotype diversity in the laboratory mouse.  
29 *Nature Genetics* **43**, 648–655. (doi:10.1038/ng.847)
- 30 35. Sarver BAJ, Keeble S, Cosart T, Tucker PK, Dean MD, Good JM. 2017 Phylogenomic  
31 Insights into Mouse Evolution Using a Pseudoreference Approach. *Genome Biol Evol* **9**,  
32 726–739. (doi:10.1093/gbe/evx034)
- 33 36. Larson EL *et al.* 2018 The Evolution of Polymorphic Hybrid Incompatibilities in House  
34 Mice. *Genetics* , genetics.300840.2018. (doi:10.1534/genetics.118.300840)
- 35 37. Conway SJ, Mahadevaiah SK, Darling SM, Capel B, Rattigan AM, Burgoyne PS. 1994  
36 Y353/B: a candidate multiple-copy spermiogenesis gene on the mouse Y chromosome.  
37 *Mammalian Genome* **5**, 203–210. (doi:10.1007/BF00360546)
- 38 38. Cocquet J, Ellis PJI, Yamauchi Y, Mahadevaiah SK, Affara NA, Ward MA, Burgoyne PS.  
39 2009 The Multicopy Gene Sly Represses the Sex Chromosomes in the Male Mouse  
40 Germline after Meiosis. *PLoS Biol* **7**, e1000244. (doi:10.1371/journal.pbio.1000244)

- 1 39. Cocquet J, Ellis PJI, Mahadevaiah SK, Affara NA, Vaiman D, Burgoyne PS. 2012 A  
2 Genetic Basis for a Postmeiotic X Versus Y Chromosome Intragenomic Conflict in the  
3 Mouse. *PLoS Genet* **8**, e1002900. (doi:10.1371/journal.pgen.1002900)
- 4 40. Gubbay J, Collignon J, Koopman P, Capel B, Economou A, Münsterberg A, Vivian N,  
5 Goodfellow P, Lovell-Badge R. 1990 A gene mapping to the sex-determining region of  
6 the mouse Y chromosome is a member of a novel family of embryonically expressed  
7 genes. *Nature* **346**, 245–250. (doi:10.1038/346245a0)
- 8 41. Mardon G, Mosher R, Disteché CM, Nishioka Y, McLaren A, Page DC. 1989 Duplication,  
9 deletion, and polymorphism in the sex-determining region of the mouse Y chromosome.  
10 *Science* **243**, 78–80. (doi:10.1126/science.2563173)
- 11 42. Silver LM. 1995 *Mouse Genetics: Concepts and Applications*. Oxford, New York: Oxford  
12 University Press.
- 13 43. Taketo M *et al.* 1991 FVB/N: an inbred mouse strain preferable for transgenic analyses.  
14 *PNAS* **88**, 2065–2069. (doi:10.1073/pnas.88.6.2065)
- 15 44. Firman RC, Simmons LW. 2008 Polyandry, sperm competition, and reproductive  
16 success in mice. *Behav Ecol* **19**, 695–702. (doi:10.1093/beheco/arm158)
- 17 45. Firman RC, Simmons LW. 2010 Experimental evolution of sperm quality via  
18 postcopulatory sexual selection in house mice. *Evolution* **64**, 1245–1256.  
19 (doi:10.1111/j.1558-5646.2009.00894.x)
- 20 46. Michaelis M, Sobczak A, Koczan D, Langhammer M, Reinsch N, Schoen J, Weitzel JM.  
21 2017 Selection for female traits of high fertility affects male reproductive performance  
22 and alters the testicular transcriptional profile. *BMC Genomics* **18**. (doi:10.1186/s12864-  
23 017-4288-z)
- 24 47. White MA, Steffy B, Wiltshire T, Payseur BA. 2011 Genetic Dissection of a Key  
25 Reproductive Barrier Between Nascent Species of House Mice. *Genetics* **189**, 289–304.  
26 (doi:10.1534/genetics.111.129171)
- 27 48. Sztein JM, Farley JS, Mobraaten LE. 2000 In Vitro Fertilization with Cryopreserved  
28 Inbred Mouse Sperm. *Biology of Reproduction* **63**, 1774–1780.  
29 (doi:10.1095/biolreprod63.6.1774)
- 30 49. Styrna J, Kilarski W, Krzanowska H. 2003 Influence of the CBA genetic background on  
31 sperm morphology and fertilization efficiency in mice with a partial Y chromosome  
32 deletion. *Reproduction* **126**, 579–588. (doi:10.1530/rep.0.1260579)
- 33 50. Al-Sarar AS, Abobakr Y, Bayoumi AE, Hussein HI, Al-Ghothemi M. 2014 Reproductive  
34 toxicity and histopathological changes induced by lambda-cyhalothrin in male mice.  
35 *Environ. Toxicol* **29**, 750–762. (doi:10.1002/tox.21802)
- 36 51. Bone W, Walden CM, Fritsch M, Voigtmann U, Leifke E, Gottwald U, Boomkamp S, Platt  
37 FM, van der Spoel AC. 2007 The sensitivity of murine spermiogenesis to miglustat is a  
38 quantitative trait: a pharmacogenetic study. *Reprod Biol Endocrinol* **5**, 1.  
39 (doi:10.1186/1477-7827-5-1)
- 40 52. Butts IAE, Ward MAR, Litvak MK, Pitcher TE, Alavi SMH, Trippel EA, Rideout RM. 2011  
41 Automated sperm head morphology analyzer for open-source software. *Theriogenology*  
42 **76**, 1756-1761.e3. (doi:10.1016/j.theriogenology.2011.06.019)
